# Supplementary material for: Comparison of Three Domestications and Wild-Harvested Plants for Nutraceutical Properties and Sensory Profiles in Five Wild Edible Herbs: Is Domestication Possible?
Source: Foods. 2020 Aug 6;9(8):1065. doi: 10.3390/foods9081065 (PMC7466383; doi:10.3390/foods9081065)
Supplement: Supplementary file 1 [file foods-09-01065-s001.docx]

| **Domestication method** | **Seeds** | **Growing Area/Location** | **Number of seedlings for each examined species** | **Duration Growing Cycle** | **Soil/Substrate** | **Pre-treatment of soil/Fertirrigation** | **Average Temperature** | **Average Relative Humidity** | **Daily Mean Solar Irradiation** |
| --- | --- | --- | --- | --- | --- | --- | --- | --- | --- |
| W | Wild | Pisa, Italy | 10 | One month1 | Mainly sandy soil (21% clay, 49% sand, 30% silt, 2% organic matter) | None | 21.3 °C | 57.5% | 1050 W m–2 |
| SS | Gargini Sementi S.n.c. (Lucca, Italy) | Greenhouse  Pisa, Italy | 10 | 35 days1 | Peat | Nutritive solution2 | 15.9 °C | 79.6% | 287.5 W m–2 |
| P | Gargini Sementi S.n.c. (Lucca, Italy) | Greenhouse  Siena, Italy | 10 | 36 days1 | Peat | Nutritive solution2 | 23.9 °C | 52.1% | 365 W m–2 |
| OF | Gargini Sementi S.n.c. (Lucca, Italy) | Siena, Italy | 10 | One month1 | Mainly silt soil (31% clay, 24% sand, 45% silt, 2% organic matter). | Manure (30 kg ha–1) as pre-treatment of soil, | 24.5 °C | 46.0% | 1050 W m–2 |

**Table S1**. Details of the three domestication methods and of the wild harvest.

1Necessary period for the growth of young aerial parts, adapted to the human consumption. 2The nutritive solution used as fertigation in SS and P domestication were composed of NO3– 10 mM, NH4+ 0.5 mM, PO43– 1 mM, K+ 6 mM, Ca2+ 4 mM, Mg2+ 2 mM, Na+ 0.5 mM, SO42– 3.5 mM, Cl– 0.5 mM, HCO3– 0.5 mM, Fe2+ 40 µM, BO3– 25 µM, Cu2+ 1 µM, Zn2+ 10 µM and Mo3+ 1 µM

**Table S2.** Pearson’s correlation coefficient among quantitative and hedonic parameters. Strong correlations were highlighted in grey.

| ***Rumex acetosa*** | | | | | |
| --- | --- | --- | --- | --- | --- |
|  | **Visual attractiveness** | **Mouthfeel pleasantness** | | **Persistency** | **Overall pleasantness** |
| **Homogeneity of dimensions** | 0.55 | | nd1 | nd | 0.02 |
| **Homogeneity of shape** | 0.09 | | nd | nd | –0.21 |
| **Colour intensity** | 0.14 | | nd | nd | –0.25 |
| **Colour regularity** | 0.15 | | nd | nd | 0.13 |
| **Hue (yellow/green)** | 0.12 | | nd | nd | –0.20 |
| **Leaf fuzzy on upper sidee** | 0.32 | | nd | nd | 0.04 |
| **Leaf fuzzy on under side** | –0.31 | | nd | nd | –0.56 |
| **Odour intensity** | nd | | 044 | –0.45 | –0.25 |
| **Smooth** | nd | | –0.47 | 0.34 | 0.47 |
| **Wrinkled** | nd | | 0.61 | –0.30 | –0.41 |
| **Pungent** | nd | | 0.00 | 0.,00 | 0.00 |
| **Flabbiness** | nd | | 0.30 | –0.06 | –0.26 |
| **Rubbery** | nd | | 0.01 | 0.12 | 0.21 |
| **Woody** | nd | | 0.24 | –0.35 | 0.01 |
| **Resistance to chewing** | nd | | –0.46 | 0.05 | 0.19 |
| **Sweet** | nd | | –0.31 | 0.15 | 0.10 |
| **Acid** | nd | | 0.21 | 0.07 | –0.44 |
| **Salty** | nd | | 0.19 | –0.26 | –0.51 |
| **Bitter** | nd | | 0.14 | –0.16 | –0.10 |
| **Hot** | nd | | –0.56 | 0.09 | 0.11 |
| **Intensity of taste** | nd | | 0.13 | –0.03 | –0.33 |
| **Complexity of taste** | nd | | –0.34 | 0.41 | 0.50 |
| **Juiciness** | nd | | –0.49 | 0.34 | 0.44 |
| **Astringency** | nd | | 0.03 | –0.23 | 0.20 |
| **Aftertaste** | nd | | 0.05 | 0.13 | 0.10 |
| ***Cichorium intybus*** | | | | | |
|  | **Visual attractiveness** | | **Mouthfeel pleasantness** | **Persistency** | **Overall pleasantness** |
| **Homogeneity of dimensions** | 0.29 | | nd | nd | –0.32 |
| **Homogeneity of shape** | –0.51 | | nd | nd | 0.06 |
| **Colour intensity** | –0.63 | | nd | nd | 0.21 |
| **Colour regularity** | 0.77 | | nd | nd | 0.23 |
| **Hue (yellow/green)** | –0.47 | | nd | nd | 0.14 |
| **Leaf fuzzy on upper side** | 0.25 | | nd | nd | 0.01 |
| **Leaf fuzzy on under side** | 0.04 | | nd | nd | –0.12 |
| **Odour intensity** | nd | | –0.52 | –0.52 | –0.04 |
| **Smooth** | nd | | –0.22 | –0.43 | 0.10 |
| **Wrinkled** | nd | | 0.33 | 0.29 | 0.04 |
| **Pungent** | nd | | 0.22 | 0.34 | –0.31 |
| **Flabbiness** | nd | | –0.01 | –0.24 | –0.03 |
| **Rubbery** | nd | | 0.54 | –0.01 | –0.20 |
| **Woody** | nd | | –0.71 | –0.21 | –0.23 |
| **Resistance to chewing** | nd | | 0.14 | 0.45 | 0.04 |
| **Sweet** | nd | | 0.00 | 0.00 | 0.00 |
| **Acid** | nd | | 0.33 | 0.41 | –0.13 |
| **Salty** | nd | | 0.10 | 0.54 | –0.06 |
| **Bitter** | nd | | 0.15 | –0.10 | 0.28 |
| **Hot** | nd | | 0.00 | 0.00 | 0.00 |
| **Intensity of taste** | nd | | –0.13 | 0.08 | –0.15 |
| **Complexity of taste** | nd | | 0.84 | 0.03 | 0.29 |
| **Juiciness** | nd | | 0.63 | 0.40 | 0.54 |
| **Astringency** | nd | | 0.20 | 0.38 | –0.36 |
| **Aftertaste** | nd | | 0.47 | 0.23 | 0.25 |
| ***Picris hieracioides*** | | | | | |
|  | **Visual attractiveness** | | **Mouthfeel pleasantness** | **Persistency** | **Overall pleasantness** |
| **Homogeneity of dimensions** | –0.11 | | nd | nd | –0.31 |
| **Homogeneity of shape** | –0.58 | | nd | nd | –0.20 |
| **Colour intensity** | 0.61 | | nd | nd | 0.24 |
| **Colour regularity** | 0.72 | | nd | nd | 0.06 |
| **Hue (yellow/green)** | 0.79 | | nd | nd | 0.23 |
| **Leaf fuzzy on upper side** | –0.11 | | nd | nd | 0.14 |
| **Leaf fuzzy on under side** | 0.10 | | nd | nd | 0.22 |
| **Odour intensity** | nd | | 0.24 | 0.39 | 0.28 |
| **Smooth** | nd | | 0.00 | 0.00 | 0.00 |
| **Wrinkled** | nd | | 0.25 | 0.42 | –0.10 |
| **Pungent** | nd | | 0.51 | 0.18 | 0.20 |
| **Flabbiness** | nd | | 0.67 | 0.80 | –0.27 |
| **Rubbery** | nd | | 0.00 | 0.00 | 0.00 |
| **Woody** | nd | | 0.39 | 0.15 | 0.12 |
| **Resistance to chewing** | nd | | –0.15 | 0.16 | 0.10 |
| **Sweet** | nd | | –0.16 | 0.01 | 0.44 |
| **Acid** | nd | | 0.54 | –0.07 | 0.39 |
| **Salty** | nd | | 0.62 | 0.07 | 0.09 |
| **Bitter** | nd | | –0.17 | –0.07 | –0.52 |
| **Hot** | nd | | 0.58 | 0.64 | –0.05 |
| **Intensity of taste** | nd | | –0.35 | –0.12 | –0.34 |
| **Complexity of taste** | nd | | 0.63 | 0.63 | –0.09 |
| **Juiciness** | nd | | 0.65 | 0.72 | –0.13 |
| **Astringency** | nd | | 0.47 | 0.48 | 0.23 |
| **Aftertaste** | nd | | 0.02 | 0.42 | –0.17 |
| ***Sanguisorba minor*** | | | | | |
|  | **Visual attractiveness** | | **Mouthfeel pleasantness** | **Persistency** | **Overall pleasantness** |
| **Homogeneity of dimensions** | 0.29 | | nd | nd | –0.33 |
| **Homogeneity of shape** | 0.22 | | nd | nd | –0.14 |
| **Colour intensity** | 0.34 | | nd | nd | –0.21 |
| **Colour regularity** | 0.35 | | nd | nd | –0.46 |
| **Hue (yellow/green)** | 0.50 | | nd | nd | 0.01 |
| **Leaf fuzzy on upper side** | 0.00 | | nd | nd | 0.00 |
| **Leaf fuzzy on under side** | 0.11 | | nd | nd | –0.34 |
| **Odour intensity** | nd | | 0.61 | 0.12 | 0.42 |
| **Smooth** | nd | | 0.39 | 0.30 | 0.47 |
| **Wrinkled** | nd | | –0.13 | 0.68 | –0.24 |
| **Pungent** | nd | | –0.28 | –0.65 | –0.24 |
| **Flabbiness** | nd | | 0.21 | –0.06 | 0.14 |
| **Rubbery** | nd | | 0.41 | 0.09 | 0.10 |
| **Woody** | nd | | 0.44 | 0.40 | 0.36 |
| **Resistance to chewing** | nd | | 0.10 | 0.09 | –0.10 |
| **Sweet** | nd | | 0.17 | 0.46 | 0.39 |
| **Acid** | nd | | 0.08 | –0.08 | 0.11 |
| **Salty** | nd | | 0.32 | 0.16 | 0.47 |
| **Bitter** | nd | | –0.17 | –0.64 | –0.21 |
| **Hot** | nd | | 0.30 | 0.37 | 0.22 |
| **Intensity of taste** | nd | | 0.10 | –0.08 | –0.51 |
| **Complexity of taste** | nd | | 0.03 | 0.48 | –0.13 |
| **Juiciness** | nd | | 0.54 | –0.10 | 0.39 |
| **Astringency** | nd | | –0.41 | –0.42 | –0.23 |
| **Aftertaste** | nd | | 0.24 | 0.21 | 0.27 |
| ***Plantago coronopus*** | | | | | |
|  | **Visual attractiveness** | | **Mouthfeel pleasantness** | **Persistency** | **Overall pleasantness** |
| **Homogeneity of dimensions** | 0.67 | | nd | nd | –0.15 |
| **Homogeneity of shape** | 0.65 | | nd | nd | –0.38 |
| **Colour intensity** | 0.53 | | nd | nd | –0.49 |
| **Colour regularity** | –0.25 | | nd | nd | 0.22 |
| **Hue (yellow/green)** | 0.65 | | nd | nd | –0.69 |
| **Leaf fuzzy on upper side** | 0.21 | | nd | nd | –0.31 |
| **Leaf fuzzy on under side** | 0.31 | | nd | nd | –0.44 |
| **Odour intensity** | nd | | –0.14 | 0.03 | 0.23 |
| **Smooth** | nd | | –0.64 | –0.27 | 0.81 |
| **Wrinkled** | nd | | 0.52 | 0.17 | –0.74 |
| **Pungent** | nd | | 0.68 | 0.36 | –0.71 |
| **Flabbiness** | nd | | –0.25 | –0.34 | 0.69 |
| **Rubbery** | nd | | –0.10 | –0.45 | 0.43 |
| **Woody** | nd | | 0.72 | 0.06 | –0.61 |
| **Resistance to chewing** | nd | | 0.37 | 0.20 | –0.42 |
| **Sweet** | nd | | –0.24 | –0.01 | 0.85 |
| **Acid** | nd | | –0.24 | –0.53 | 0.22 |
| **Salty** | nd | | –0.06 | 0.04 | 0.44 |
| **Bitter** | nd | | 0.31 | –0.14 | –0.33 |
| **Hot** | nd | | 0.11 | –0.09 | 0.19 |
| **Intensity of taste** | nd | | –0.24 | 0.09 | 0.37 |
| **Complexity of taste** | nd | | –0.08 | –0.19 | 0.64 |
| **Juiciness** | nd | | –0.15 | 0.08 | 0.58 |
| **Astringency** | nd | | 0.21 | –0.02 | –0.37 |
| **Aftertaste** | nd | | 0.12 | –0.19 | –0.24 |

1 nd: not detected
